# Supplementary material for: Influence of enhanced Asian NO x emissions on ozone in the upper troposphere and lower stratosphere in chemistry–climate model simulations
Source: Copernicus journal article supplement (doi:10.5194/acp-17-1297-2017), 2017-01-27
Supplement: Supplementary file 1 [file acp-17-1297-2017-supplement.zip]

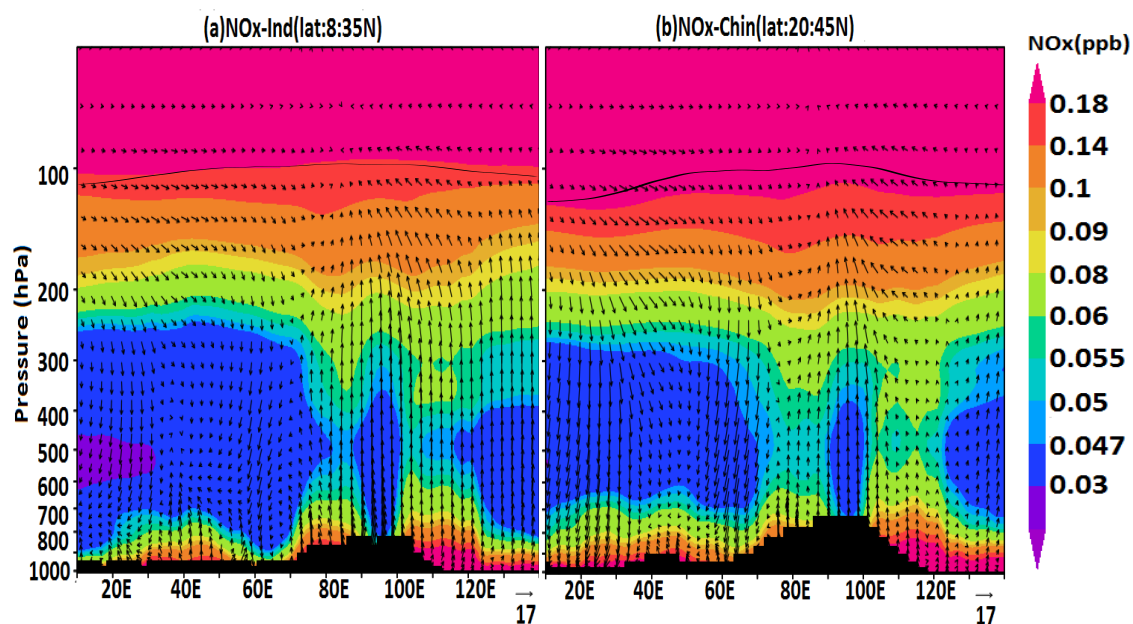

Figure S3: Vertical distribution of NO<sub>x</sub> (ppb) averaged for the monsoon season (June-September) over (a) India (8°-35°N) and (b) China (20°-45°N) as obtained from CTRL simulations. Black arrows indicate winds (m/s) (the vertical component has been scaled by 300) and the black line represents the tropopause.
