# Supplementary material for: Influence of enhanced Asian NO x emissions on ozone in the upper troposphere and lower stratosphere in chemistry–climate model simulations
Source: Copernicus journal article supplement (doi:10.5194/acp-17-1297-2017), 2017-01-27
Supplement: Supplementary file 2 [file acp-17-1297-2017-supplement.zip]

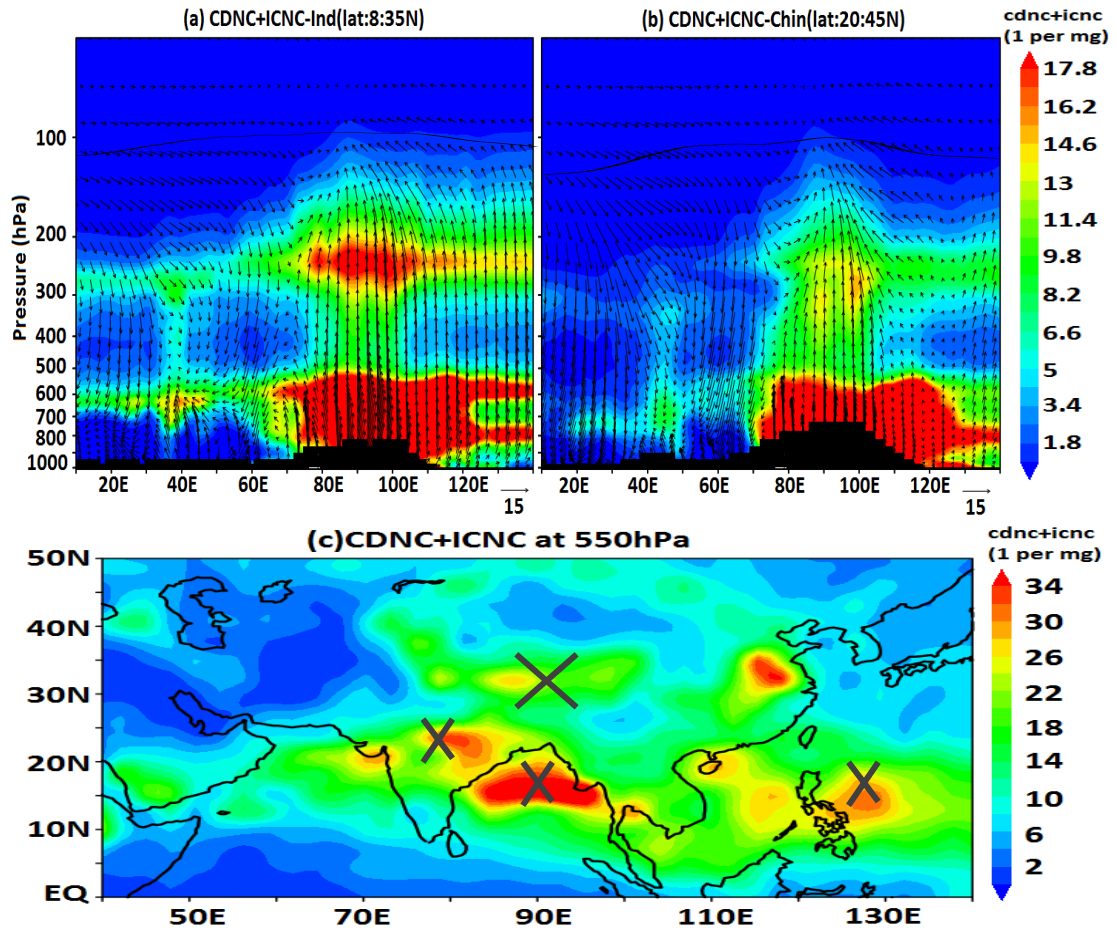

Figure S4: Distribution of combined cloud droplet (CDNC) and ice crystal (ICNC) number concentrations (in  $\text{mg}^{-1}$ ) averaged for the monsoon season (June-September) over (a) India (8°-35°N) and (b) China (20°-45°N) as simulated in the CTRL simulation. Black arrows indicate winds (m/s) (the vertical component has been scaled by 300), and the black line represents the tropopause. (c) Distribution of seasonal (June-September) mean combined CDNC+ICNC (in  $\text{mg}^{-1}$ ) at 550 hPa as simulated in the CTRL simulation. The regions of Bay of Bengal, South China Sea, southern slopes of Himalayas and Tibetan Plateau are indicated with a cross symbol.
