# Supplementary material for: Influence of enhanced Asian NO x emissions on ozone in the upper troposphere and lower stratosphere in chemistry–climate model simulations
Source: Copernicus journal article supplement (doi:10.5194/acp-17-1297-2017), 2017-01-27
Supplement: Supplementary file 3 [file acp-17-1297-2017-supplement.zip]

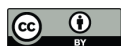

## *Supplement of*

# **Influence of enhanced Asian $\text{NO}_x$ emissions on ozone in the upper troposphere and lower stratosphere in chemistry–climate model simulations**

**Chaitri Roy et al.**

*Correspondence to:* Suvarna Fadnavis (suvarna@tropmet.res.in)

- acp-17-1297-2017-supplement-title-page.pdf
- supplementary
  - figS1.pdf
  - figS2.pdf
  - figS3.pdf
  - figS4.pdf
  - figS5.pdf
  - figS6.pdf

The copyright of individual parts of the supplement might differ from the CC-BY 3.0 licence.
