# Supplementary material for: Influence of enhanced Asian NO x emissions on ozone in the upper troposphere and lower stratosphere in chemistry–climate model simulations
Source: Copernicus journal article supplement (doi:10.5194/acp-17-1297-2017), 2017-01-27
Supplement: Supplementary file 4 [file acp-17-1297-2017-supplement.zip]

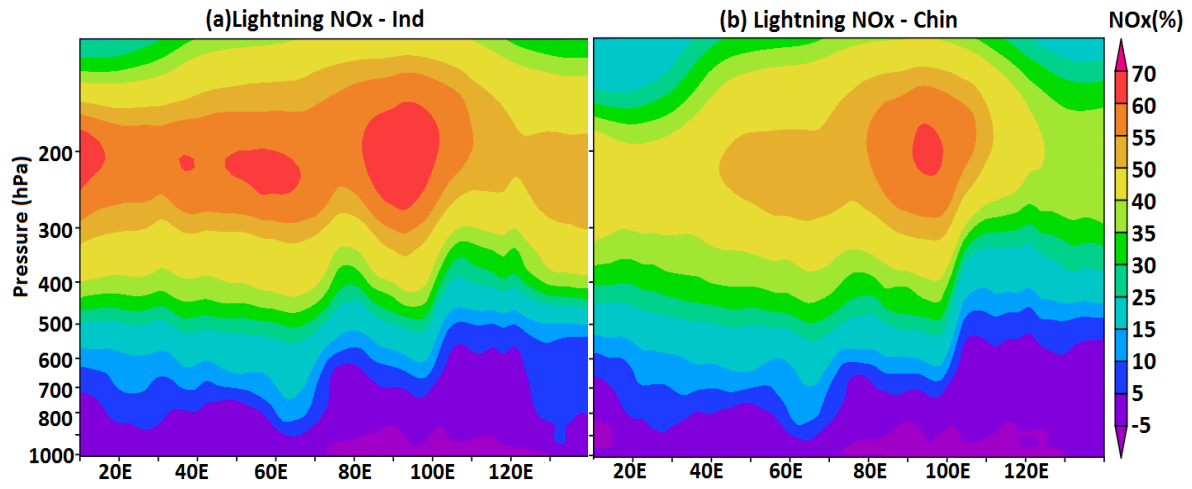

Figure S5: Vertical distribution of percentage NO<sub>x</sub> anomalies produced from lightning, averaged for the monsoon season (June-September) over (a) India (8°-35°N) and (b) China (20°-45°N), obtained from comparing the CTRL (Lightning-on) and the Lightning-off experiments.
