# Supplementary material for: Influence of enhanced Asian NO x emissions on ozone in the upper troposphere and lower stratosphere in chemistry–climate model simulations
Source: Copernicus journal article supplement (doi:10.5194/acp-17-1297-2017), 2017-01-27
Supplement: Supplementary file 5 [file acp-17-1297-2017-supplement.zip]

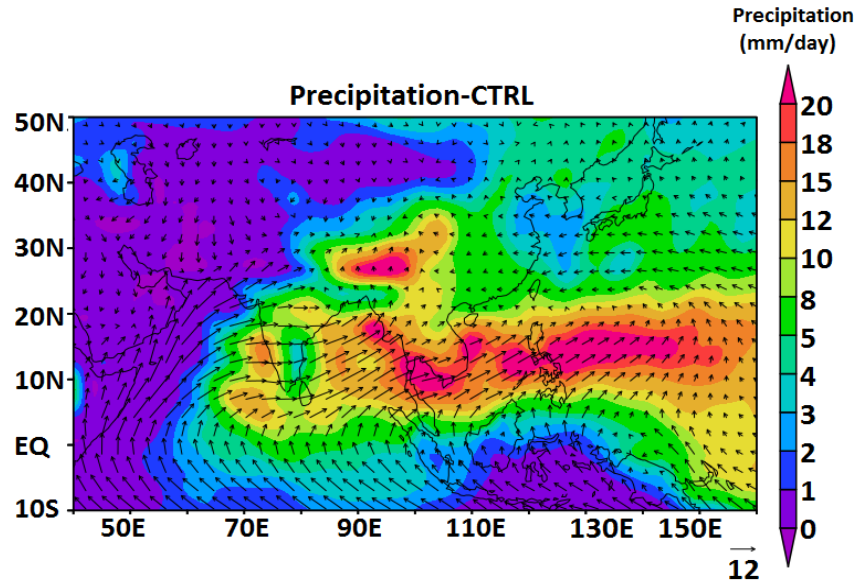

Figure S2: Distribution of seasonal (June-September) mean precipitation ( $\text{mm day}^{-1}$ ) as obtained from CTRL simulation. Black arrows indicate winds ( $\text{m/s}$ ).
