# Supplementary material for: Influence of enhanced Asian NO x emissions on ozone in the upper troposphere and lower stratosphere in chemistry–climate model simulations
Source: Copernicus journal article supplement (doi:10.5194/acp-17-1297-2017), 2017-01-27
Supplement: Supplementary file 6 [file acp-17-1297-2017-supplement.zip]

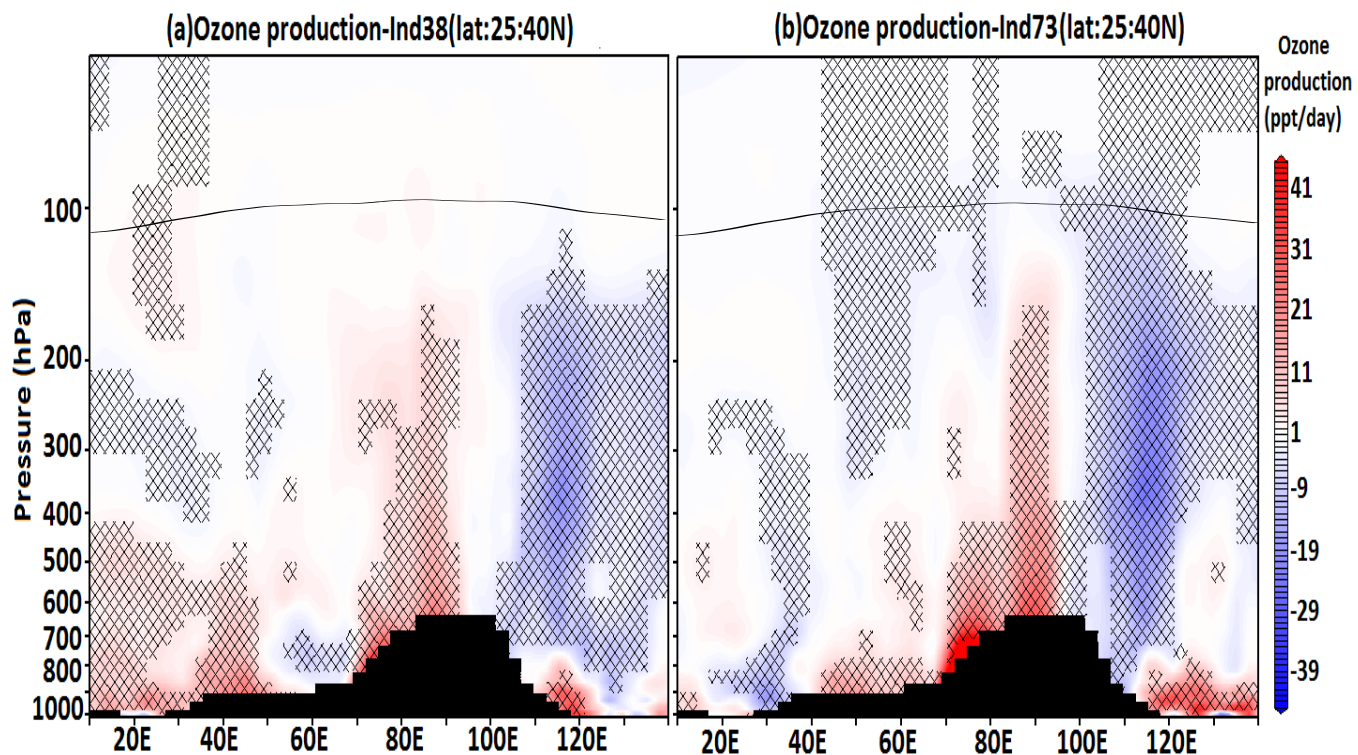

Figure S6: Longitude pressure cross-section of changes in net ozone production ( $\text{ppt day}^{-1}$ ) due to enhanced  $\text{NO}_x$  with respect to the CTRL simulation, averaged for the monsoon season (June-September) and over the Indo-Gangatic plain-Tibetan Plateau region ( $25^\circ\text{N}$ - $40^\circ\text{N}$ ) for (a) Ind38 (b) Ind73. The black line shows the tropopause while black hatched lines indicate 95% confidence level.
