# Supplementary material for: Influence of enhanced Asian NO x emissions on ozone in the upper troposphere and lower stratosphere in chemistry–climate model simulations
Source: Copernicus journal article supplement (doi:10.5194/acp-17-1297-2017), 2017-01-27
Supplement: Supplementary file 7 [file acp-17-1297-2017-supplement.zip]

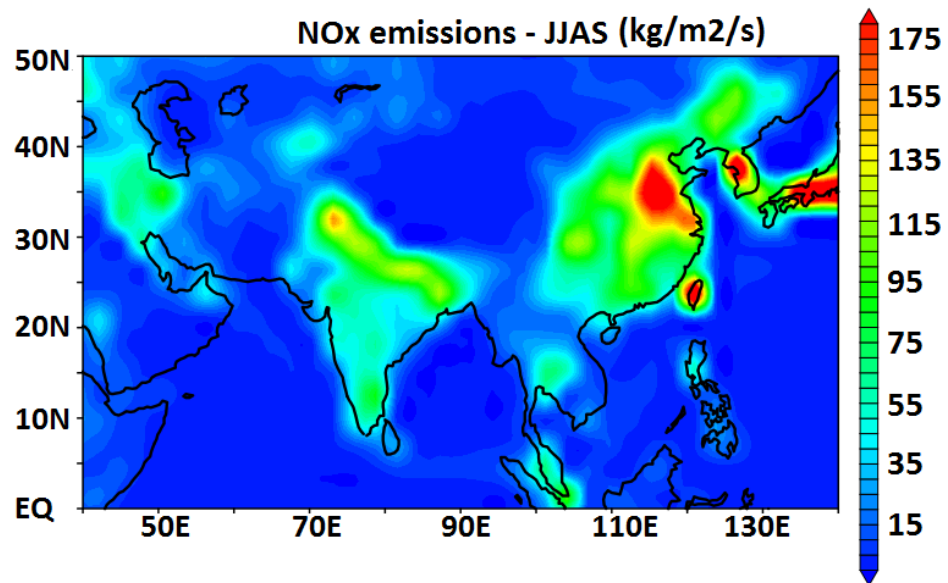

Figure S1: Distribution of NO<sub>x</sub> emission mass flux ( $\text{kg m}^{-2} \text{s}^{-1}$ ) from RETRO project data set for the year 2000, averaged for the monsoon season (June-September).
